# Supplementary material
Source: publisher figshare collection journal article supplement (https://tandf.figshare.com/ndownloader/files/11917100)
Supplement: Supplementary file 1 [file 11917100]

**Table S1 – Included measures, brief description and full citation**

| # | Full name                                                             | Measure Abbrev | Brief Description                                                                                                                                                                                        | Citation                                                                                                                                                                                                                                                                           |
|---|-----------------------------------------------------------------------|----------------|----------------------------------------------------------------------------------------------------------------------------------------------------------------------------------------------------------|------------------------------------------------------------------------------------------------------------------------------------------------------------------------------------------------------------------------------------------------------------------------------------|
| 1 | Bath adolescent pain questionnaire                                    | BAPQ           | Assessment tool designed specifically for use with adolescents who experience chronic pain. Assess the widespread deleterious impact of adolescent chronic pain in both a research and clinical setting. | The Bath Adolescent Pain Questionnaire (BAPQ): development and preliminary psychometric evaluation of an instrument to assess the impact of chronic pain on adolescents. Eccleston C, Jordan A, McCracken LM, Slead M, Connell H, Clinch J. <i>Pain</i> . 2005 Nov;118(1-2):263-70 |
| 2 | Caregiver Priorities and Child Health Index of Life with Disabilities | CPCHILD        | Caregivers' perspectives on the health status, comfort, well being, and ease of care in children with severe disabilities                                                                                | Narayanan U.G, Fehlings D, Weir S., Knights S., Kiran S, & Campbell K. (2006). Initial development and validation of the caregiver priorities and child health index of life with disabilities (CPCHILD). <i>Developmental Medicine and Child Neurology</i> ;48(10):804-12.        |
| 3 | Caregiver Questionnaire                                               | CQ             | Measures the perceived level of caregiver difficulty in performing Activity of Daily Living for children with quadriplegic CP                                                                            | Schneider JW, Gurucharri LM, Gutierrez AL, Gaebler-Spira DJ. (2001). Health-related quality of life and functional outcome measures for children with cerebral palsy. <i>Developmental Medicine and Child Neurology</i> ;43(9):601-8.                                              |
| 4 | Child Behaviour Checklist                                             | CBCL           | Checklist, parents report on emotional and behavioural problems in children and adolescents                                                                                                              | Achenbach, T.M., & Rescorla, L. A. (2001). Manual for the ASEBA School-Age Forms and Profiles. Burlington, VT: University of Vermont, Research Center for Children, Youth, and Families.                                                                                           |
| 5 | Child Health Questionnaire                                            | CHQ            | Multidimensional quality of life instrument focuses on physical and psychosocial functioning and well-being.                                                                                             | Landgraf JM, Maunsell E, Speechley KN, Bullinger M, Campbell S, Abetz L, Ware JE. (1998). Canadian-french, german and UK versions of the child health questionnaire: Methodology and preliminary item scaling results. <i>Qual Life Res</i> ;7(5):433-45.                          |

|    |                                                |             |                                                                                                                                                                                                                                                                       |                                                                                                                                                                                                                                                                                                     |
|----|------------------------------------------------|-------------|-----------------------------------------------------------------------------------------------------------------------------------------------------------------------------------------------------------------------------------------------------------------------|-----------------------------------------------------------------------------------------------------------------------------------------------------------------------------------------------------------------------------------------------------------------------------------------------------|
| 6  | Child self efficacy scale-Child version        | CSES_Child  | Self-report tool. Assess functioning despite pain in order to assess normal functioning (well behavior)                                                                                                                                                               | Preliminary validation of a self-efficacy scale for child functioning despite chronic pain (child and parent versions).<br>Bursch B, Tsao JC, Meldrum M, Zeltzer LK. <i>Pain</i> . 2006 Nov;125(1-2):35-42.                                                                                         |
| 7  | Child self efficacy scale-Parent version       | CSES_Parent | Proxy report tool. Assess functioning despite pain in order to assess normal functioning (well behavior)                                                                                                                                                              | Preliminary validation of a self-efficacy scale for child functioning despite chronic pain (child and parent versions).<br>Bursch B, Tsao JC, Meldrum M, Zeltzer LK. <i>Pain</i> . 2006 Nov;125(1-2):35-42.                                                                                         |
| 8  | Face, Legs, Activity, Cry, Consolability scale | FLACC       | Assesses pain intensity in children - Behavioural Scale scoring postoperative pain                                                                                                                                                                                    | Merkel S., et al. (1997). The FLACC: A behavioral scale for scoring postoperative pain in young children. <i>Pediatr Nurse</i> 23(3), p. 293-297.                                                                                                                                                   |
| 9  | Faces Pain Scale – Revised                     | FPS-R       | Set of line drawings or photographs of faces that depict pain states                                                                                                                                                                                                  | Chambers, C. T., Giesbrecht, K., Craig, K. D., Bennett, S. M., & Huntsman, E. (1999). A comparison of faces scales for the measurement of pediatric pain: Children’s and parents’ ratings. <i>Pain</i> , 83, 25–35.                                                                                 |
| 10 | Functional Disability Inventory                | FDI         | FDI is a commonly used measure of physical functioning and disability in youth with chronic pain                                                                                                                                                                      | Walker LS, Greene JW. The functional disability inventory: measuring a neglected dimension of child health status. <i>Journal of Pediatric Psychology</i> . 1991;16(1):39–58. [PubMed]                                                                                                              |
| 11 | General Health Questionnaire                   | GHQ         | Describes two major areas: inability to carry out normal functions and appearance of new and distressing                                                                                                                                                              | Goldberg, D. P. & Williams, P. (1988). <i>The User’s Guide to the General Health Questionnaire</i> . NFER-Nelson: Windsor.                                                                                                                                                                          |
| 12 | Health Utilities Index-2                       | HUI2        | HUI refers to both HUI Mark 2 (HUI2) and HUI Mark 3 (HUI3) instruments. The classification systems provide compact but comprehensive frameworks within which to describe health status. The multi-attribute utility functions provide all the information required to | Torrance, George W., David H. Feeny, William J. Furlong, Ronald D. Barr, Yueming Zhang, and Qinan Wang, "Multi-Attribute Preference Functions for A Comprehensive Health Status Classification System: Health Utilities Index Mark 2." <i>Medical Care</i> , Vol. 34, No. 7, July 1996, pp 702-722. |

|    |                                                      |            |                                                                                                                                                                                                                                          |                                                                                                                                                                                                               |
|----|------------------------------------------------------|------------|------------------------------------------------------------------------------------------------------------------------------------------------------------------------------------------------------------------------------------------|---------------------------------------------------------------------------------------------------------------------------------------------------------------------------------------------------------------|
|    |                                                      |            | calculate single-summary scores of health-related quality of life (HRQL) for each health state defined by the classification systems.                                                                                                    |                                                                                                                                                                                                               |
| 13 | Health Utilities Index-3                             | HUI3       | A system for measuring health status, health-related quality of life, and producing utility scores                                                                                                                                       | Horsman J, Furlong W, Feeny D, Torrance G. (2003).The health utilities index (HUI): Concepts, measurement properties and applications. <i>Health Qual Life Outcomes</i> 16;1:54.                              |
| 14 | impact of OSA symptoms on health-related QoL         | OSA-18     | Evaluates the impact of Obstructive Sleep Apnea symptoms on health-related quality of life                                                                                                                                               | Strocker AM, Carrer A, Shapiro NL. (2005). The validity of the OSA-18 among three groups of pediatric patients. <i>International Journal of Pediatric Otorhinolaryngology</i> ;69(2):241–247.                 |
| 15 | Non-Communicative Children's Pain Checklist revised  | NCCPC-R    | Designed to be used for children, aged 3 to 18 years, who are unable to speak because of cognitive (mental/intellectual) impairments or disabilities. It can be used whether or not a child has physical impairments or disabilities.    | Breau, L.M., McGrath, P.J., Camfield, C.S. & Finley, G.A. (2002).                                                                                                                                             |
| 16 | Pain coping questionnaire                            | PCQ        | Assess children's pain coping strategies. The items are simple and relatively few, making it useful for assessing coping across a wide age range. It can be administered to children as young as 8 years of age in approximately 15 min. | Reid GJ, Gilbert CA, McGrath PJ. The pain coping questionnaire: preliminary validation. <i>Pain</i> 1998;76:83–96                                                                                             |
| 17 | Pain diary                                           | Pain diary | Self-report Description of sleep pattern                                                                                                                                                                                                 | na                                                                                                                                                                                                            |
| 18 | Pain Indicator for communicatively impaired children | PICIC      | Proxy measure - Parents of communicatively impaired children with severe cognitive impairments rate six core cues indicating definite or severe pain in their child                                                                      | The development and evaluation of the pain indicator for communicatively impaired children (PICIC). Stallard P, Williams L, Velleman R, Lenton S, McGrath PJ, Taylor G. <i>Pain</i> . 2002 Jul;98(1-2):145-9. |

|    |                                                |                 |                                                                                                                                           |                                                                                                                                                                                                                                                                          |
|----|------------------------------------------------|-----------------|-------------------------------------------------------------------------------------------------------------------------------------------|--------------------------------------------------------------------------------------------------------------------------------------------------------------------------------------------------------------------------------------------------------------------------|
| 19 | Pain intensity self-report Visual analog scale | VAS             | graphic representation of pain intensity by marking a point on a line                                                                     | Huskisson EC. Visual analogue scales. In: Melzack R, editor. Pain measurement and assessment. New York, NY: Raven Press; 1983. pp. 33–37.                                                                                                                                |
| 20 | Pediatric Outcomes Data Collection Inventory   | PODCI           | Subjective measurement, assesses outcomes in pediatric musculoskeletal conditions                                                         | Daltroy, L. H., Liang, M. H., Fossel, A. H., & Goldberg, M. J. (1998). The POSNA pediatric musculoskeletal functional health questionnaire: Report on reliability, validity, and sensitivity to change. <i>Journal of Pediatric Orthopaedics</i> , 18(5), 561-571        |
| 21 | Pediatric pain profile                         | PPP             | Behaviour rating scale for assessing pain in children with severe physical and learning impairments.                                      | Hunt, A., Mastroyannopoulou, K., Goldman, A., Seers, K., 2003. Not knowing - the problem of pain in children with severe neurological impairment. <i>International Journal of Nursing Studies</i> 40 (2), 171-183.                                                       |
| 22 | Pediatric Pain Questionnaire                   | PPQ             | Assess pain intensity and location and the sensory, affective, and evaluative qualities of pain, appropriate for children and adolescents | Varni JW, Thompson KL, Hanson V. The Varni/Thompson Pediatric Pain Questionnaire. I.Chronic musculoskeletal pain in juvenile rheumatoid arthritis. <i>Pain</i> 1987;28:27–38.                                                                                            |
| 23 | Poker Chip Tool                                | Poker Chip Tool | Poker Chip scale uses four ‘poker chips’ as ‘pieces of hurt’ which the child uses to indicate how much pain they are feeling              | Hester NO, Foster R, Kristensen K. Measurement of pain in children: Generalizability and validity of the pain ladder and the poker chip tool. In: Tyler DC, Crane EJ, editors. <i>Advances in pain research and therapy</i> . Vol. 15. New York: Raven; 1990. pp. 79–84. |
| 24 | Quality of life of children with CP            | CPQOL           | Measures the Quality of Life of children with cerebral palsy                                                                              | Waters E., Maher E., Salmon L., Reddihough D., & Boyd R. (2005). Development of a condition-specific measure of quality of life for children with cerebral palsy: Empirical thematic data reported by parents and children. <i>Child Care Health Dev</i> ;31(2):127-35.  |
| 25 | Single-item Pain question                      | Pain YES/NO     | Self-developed question, e.g."are you experiencing pain?"                                                                                 | na                                                                                                                                                                                                                                                                       |

|    |                                                   |                  |                                                                                                                |                                                                                                                                                                                                                                                                                                   |
|----|---------------------------------------------------|------------------|----------------------------------------------------------------------------------------------------------------|---------------------------------------------------------------------------------------------------------------------------------------------------------------------------------------------------------------------------------------------------------------------------------------------------|
| 26 | Sleep diary                                       | Sleep diary      | Self-report Description of sleep pattern                                                                       | na                                                                                                                                                                                                                                                                                                |
| 27 | Oucher_photograph scale                           | The Oucher       | The OUCHER is a poster developed for children to help them communicate how much pain or hurt they feel.        | <a href="http://www.oucher.org/the_scales.html">http://www.oucher.org/the_scales.html</a> ©The Caucasian version of the OUCHER was developed and copyrighted by Judith E. Beyer, PhD, RN, USA, 1983.                                                                                              |
| 28 | The Pediatric Quality of Life Inventory           | PEDSQL           | Multidimensional measure of HRQOL in healthy children and adolescents and acute and chronic health conditions. | Varni JW, Burwinkle TM, Berrin SJ, Sherman SA, Artavia K, Malcarne VL, & Chambers HG. (2006). The PedsQL in pediatric cerebral palsy: Reliability, validity, and sensitivity of the generic core scales and cerebral palsy module. <i>Developmental Medicine and Child Neurology</i> 48(6):442-9. |
| 29 | The Pediatric Quality of Life Inventory_CP module | PEDSQL_CP module | PEDSQL-module specific for CP                                                                                  | Varni et al                                                                                                                                                                                                                                                                                       |
| 30 | The Pediatric Quality of Life Inventory_PPQ       | PEDSQL_PPQ       | PEDSQL-module specific for pain                                                                                | Varni et al                                                                                                                                                                                                                                                                                       |
| 31 | TNO-AZL questionnaire for Children's HRQOL        | TACQOL           | Measures health related quality of life of children                                                            | Verrips GH, Vogels AGC, Verloove-Vanhorick SP, Fekkes M, Koopman HM, Kamphuis RP, Theunissen NCM, Wit JM. (1998)Health-Related Quality of Life Measure for Children - the TACQOL. <i>Journal of Applied Therapeutics</i> ; 1/4: 357-360                                                           |

**Table S2** Excluded measures

| <b>Abbreviation</b> | <b>Full name</b>                                  |
|---------------------|---------------------------------------------------|
| <b>CALI</b>         | Child Activity Limitations Interview              |
| <b>CPAQ</b>         | Chronic pain acceptance questionnaire             |
| <b>GCP</b>          | Graded chronic pain                               |
| <b>PIPS</b>         | Psychological inflexibility in pain scale         |
| <b>PPCI</b>         | Pediatric pain coping inventory                   |
| <b>PASS</b>         | Pain anxiety symptoms scales                      |
| <b>PSOCQ</b>        | Pain stages of pain questionnaire for adolescents |

Reasons for exclusion: measure not developed for children with disabilities, target adult population, no detailed psychometric testing
